# Supplementary material for: Isolation and Characterization of Analytical Marker Compound from Polyherbal Antigout Remedy
Source: Preprints.org preprint supplement (doi:10.20944/preprints202301.0149.v1), 2023-01-09
Supplement: Supplementary file 1 [file supplementary]

**Respected Editor,**

Enclosed is a manuscript entitled **“Isolation and characterization of analytical marker compound from polyherbal antigout remedy”** to be considered for publication in Preprints. It describes for the first-time isolation of marker compound of remedy which can be used as characteristic marker for standardization of remedy.

This paper is our original work. We certify that this manuscript has not been published in part or whole elsewhere in any language, and it has not been submitted to any other journal for reviews. This manuscript is from our Ph.D. thesis work which is in HEC Turnitin repository having repository ID 1518705325

The authors have no conflicts of interest to declare

Sincerely,

**Dr. Ayisha Shaukat, Ph.D (Pharmaceutical Chemistry)**

Punjab University College of Pharmacy, University of the Punjab, Allama Iqbal Campus, Lahore-54000, Pakistan. Email: [ayishashaukat@gmail.com](mailto:ayishashaukat@gmail.com), Phone: +923234106446.
